# Supplementary material for: Defective Fe/Co-MOF with abundant oxygen vacancies as an efficient oxidase mimic for colourimetric and sensitive determination of tetracycline
Source: Royal Society of Chemistry journal article supplement (doi:10.1039/d4nj03176h), 2024-01-01
Supplement: d4nj03176h1.pdf [file d4nj03176h1.pdf]

# **Defective Fe/Co-MOF with Abundant Oxygen Vacancies as an Efficient Oxidase Mimic for Colourimetric and Sensitive Determination of Tetracycline**

Xiaoyue Yue <sup>a, b, c</sup>, Chaoyun Wu <sup>a</sup>, Chenxu Hao <sup>a</sup> and Yanhong Bai <sup>a, b, c, \*</sup>

<sup>a</sup> College of Food and Bioengineering, Zhengzhou University of Light Industry, Zhengzhou, Henan Province, 450001, China;

<sup>b</sup> Key Laboratory of Cold Chain Food Processing and Safety Control (Zhengzhou University of Light Industry), Ministry of Education, Zhengzhou, 450001, China;

<sup>c</sup> Henan Key Laboratory of Cold Chain Food Quality and Safety Control, Zhengzhou University of Light Industry, Zhengzhou, 450001, China;

**\*Corresponding Author:** Yanhong Bai

**E-mail:** baiyanhong212@163.com;

## **Instruments**

The UV absorption spectra were obtained using a multifunctional microplate reader (TECAN Spark, Australia). SEM images were taken with a high-resolution cold field emission scanning electron microscope (Regulus 8100, Japan). TEM images were taken with a high-throughput field emission transmission electron microscope (JEOL JEM 2800, Japan). The X-ray polycrystalline diffraction (XRD) spectra were obtained using a powder diffraction instrument (Rigaku D/MAX-2600, Japan). XPS spectra were obtained using an X-ray photoelectron spectroscopy (Thermo Scientific K-Alpha, USA). The corresponding Raman spectra were obtained by a Raman spectroscopy (Thermo Scientific DXR, USA). Infrared spectra were captured by a Fourier transform infrared spectrometer (Vertex 70, Germany). The electron paramagnetic resonance spectrometer (A JES FA200, Japan) was used to detect free radicals.

### **Captions of Figures**

**Fig. S1.** Optimization of detection conditions.

**Fig. S2.** Explore the optimal ratio between the D-Fe/Co-MOF/TMB system and the target detection object.

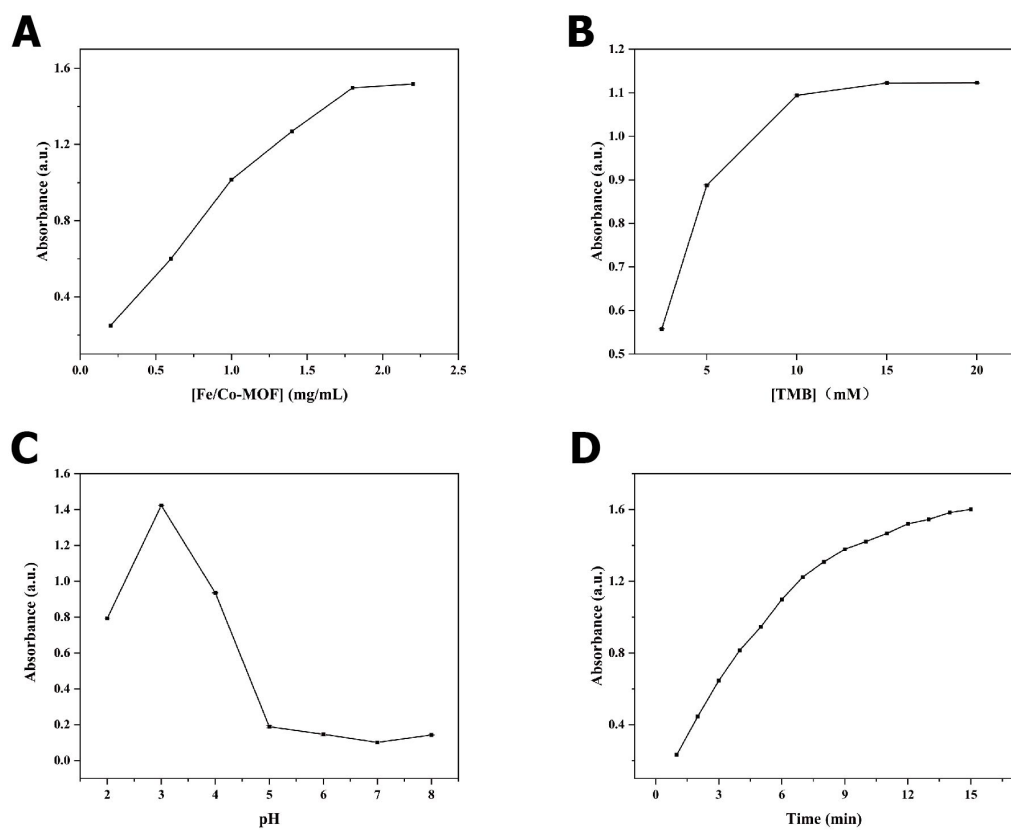

**Fig. S1**

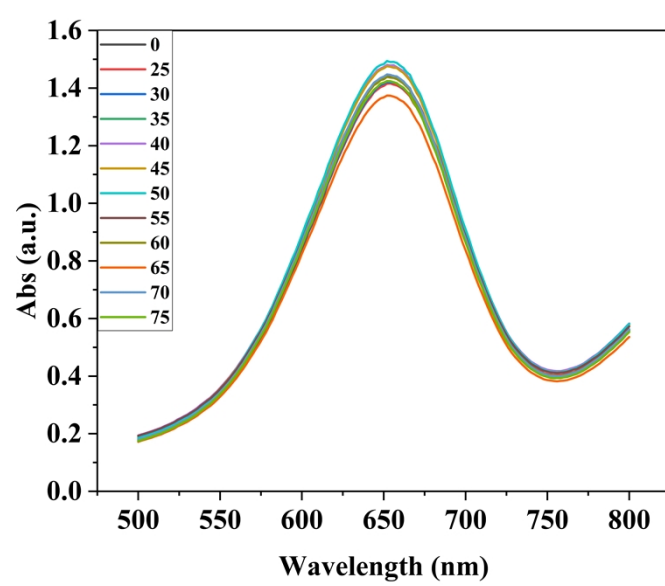

Fig. S2
